# Supplementary material for: Long-decay near-infrared-emitting doped quantum dots for lifetime-based in vivo pH imaging
Source: Royal Society of Chemistry journal article supplement (doi:10.1039/c5cc03046c), 2015-01-01
Supplement: c5cc03046c1.pdf [file c5cc03046c1.pdf]

## Electronic Supplementary Information

### **Long-Decay Near-Infrared-Emitting Doped-Quantum Dots for Lifetime-Based *in Vivo* pH Imaging**

Chi Chen, Pengfei Zhang, Li Zhang, Duyang Gao, Guanhui Gao, Yong Yang,  
Wenjun Li, Ping Gong and Lintao Cai\*

\*E-mail: [lt.cai@siat.ac.cn](mailto:lt.cai@siat.ac.cn)

## 1. Materials and Instrumentations

Zinc acetate ( $\text{Zn(OAc)}_2$ , 99.99%), glutathione (GSH) were purchased from Sigma-Aldrich. Cadmium chloride ( $\text{CdCl}_2$ , 99.996%), copper (II) chloride dihydrate ( $\text{CuCl}_2 \cdot 2\text{H}_2\text{O}$ ,  $\geq 99\%$ ) were purchased from Alfa Aesar. Pierce Iminobiotin Agarose Microbead ( $\sim 100 \mu\text{m}$ , iminobiotin on crosslinked 6% beaded agarose, slurried in water with sodium azide) was purchased from Thermo Scientific. Water was purified with a Milli-Q water purification system. All other reagents and solvents were of analytical grade. Inductively coupled plasma optical emission spectroscopy (ICP-OES) data were taken by PerkinElmer Optima 7000 DV. The absorption spectra and fluorescence spectra were recorded on a PerkinElmer Lambda 25 absorption spectrophotometer and a FSP 920 fluorometer respectively. The samples were all excited at 400 nm using Xe-900 lamp apparatus. Transmission electron microscopy (TEM) images were taken on a FEI Tecnai G2 F20 S-Twin transmission electron microscope operating at 200 kV. X-ray diffraction (XRD) measurements were performed on Bruker D8 Advance X-ray diffractometer, which was equipped with a  $\text{Cu K}\alpha$  X-ray source. X-ray photoelectron spectroscopy spectra (XPS) data were taken by Thermo ESCALAB 250XI Multifunctional imaging electron spectrometer, which was equipped with a  $\text{Al K}\alpha$  source.

## 2. Synthesis of Cu-Doped Gradiently Alloyed ZnCdS QDs

$\text{CdCl}_2$  stock solution was prepared by dissolving 0.183 g  $\text{CdCl}_2$  in 10 mL water.

$\text{Zn(OAc)}_2$  stock solution was prepared by dissolving 0.183 g  $\text{Zn(OAc)}_2$  in 10 mL

water. The GSH stabilizer solution was prepared by dissolving 0.123 g GSH in 10 mL water.  $\text{CuCl}_2$  stock solution was prepared by dissolving 0.171 g  $\text{CuCl}_2 \cdot 2\text{H}_2\text{O}$  in 10 mL water.

For a 10 mL synthesis of Cu-doped QDs, 20  $\mu\text{L}$  of  $\text{CdCl}_2$  (0.1 M), 80  $\mu\text{L}$  of  $\text{Zn(OAc)}_2$  (0.1 M), 0.5 mL of GSH (0.04 M) and 1  $\mu\text{L}$  of  $\text{CuCl}_2$  (0.1 M) were added to a 15 mL centrifuge tube and diluted to 10 mL with water, and the pH of the solution was adjusted to 10.5 by dropwise addition of 1.0 M NaOH solution while stirring. This solution was then incubated on a heat block preheated to 95 °C for 30, 60, 90 and 120 min to promote nanocrystals growth.

The original QDs were purified with an Amicon Ultra-4 centrifugal filter device (YM-3, Merck Millipore) via centrifugation at 8000 rpm for 20 min for several times, and then were redissolved in PBS buffer with the same volume.

### **3. Fabrication of Fluorescently Microbeads**

The purified QDs-720 were selected to equipped the microbeads. Generally, 40  $\mu\text{L}$  of as-prepared QDs (2.0 mg/mL) was mixed with 20  $\mu\text{L}$  of microbeads. Then the fluorescently encoded microbeads were washed by water and precipitation for three times. The driving force for the incorporation process of QDs into microbeads can be attributed to the NH–O hydrogen bonding between the amino groups anchored on the surface of QDs and hydroxyl groups on the agarose micebeads.<sup>[1]</sup>

#### **4. Stability Measurements**

The purified QDs-720 were evaluated by incubating the purified QDs in water at 37 °C, and the photoluminescence intensities were recorded at different time for a week. The photo-stabilities of QDs-720 in buffers with different pH values (6.0 and 7.0) were evaluated by continuously exciting the QDs with 400 nm laser for up to 90 min.

#### **5. Cytotoxicity Measurements**

The cytotoxicity of QDs-720 were evaluated by using the Cell Counting Kit-8 (CCK-8, Dojingdo, Kumamoto, Japan) assay. The MDA-MB-231 cells (3000 cells/well) were seeded into 96-well plates and incubated for 24 h. The cells were incubated for 24 h with various concentrations of QDs (0.1, 1, 10, 20, 50, 100, 200, and 500 µg/mL). 10 µL of CCK-8 water solution was added and further incubated for 2 h. The absorbance was measured at 450 nm with the Biotek Synergy 4 micro plate reader.

#### **6. Lifetime-Based pH Response Experiment**

Generally, 10 µL of purified QDs-720 were mixed with 90 µL of Britton-Robison buffers with different pH values (4.0, 5.0, 5.25, 5.5, 5.75, 6.0, 6.25, 6.5, 6.75, 7.0, 7.5, 8.0, 9.0), respectively. Then the time-resolved fluorescence decay curves of QDs-720 in buffers with different pH values were recorded on a FSP 920 fluorometer. The samples were all excited at 474 nm using laser apparatus.

#### **7. *In Vivo* Imaging Measurement**

QDs-720 were chosen for the living nude mice fluorescence lifetime imaging and NIR multicolor imaging. Eight-to-nine weeks old female Balb/c nude mice were purchase from Guangdong Province Laboratory Animal Center (Guangzhou, China), and maintained in the institutional animal care facility. The procedures were approved by Shenzhen Institutes of Advanced Technology, Chinese Academy of Sciences Animal Care and Use Committee. The nude mice were anesthetized with 1% of pentobarbital sodium (Sigma-Aldrich, USA) and 50  $\mu$ l of QDs-720 were injected subcutaneously into the adjacent spots with different pH (pH= 6.0 and 7.0, respectively) on the back. The FLIM images were obtain with an time-resolved fluorescence microscopy (PicoQuant MicroTime 100, excitation, 485 nm, emission, 500 nm long-pass). And the NIR multicolour images were obtained with an *in vivo* imaging system (Maestro, CRi, Inc, excitation, 435-480 nm; emission, 490 nm long-pass).

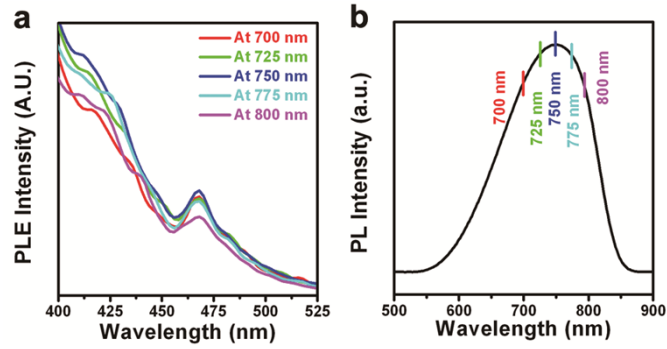

**Figure S1.** (a) The PLE spectra at different position of Cu-doped gradiently alloyed CdZnS QDs and (b) PL spectra of Cu-doped gradiently alloyed CdZnS QDs indicated that photoluminescence at specific stage were originated from the same set of nanocrystals.

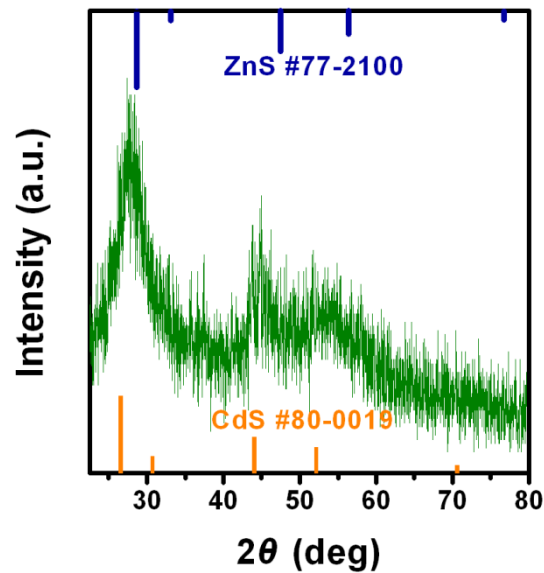

**Figure S2.** XRD patterns for QDs-720. Bulk diffraction peaks for zinc blende (ZB) ZnS (top) and ZB CdS (bottom) are indexed.

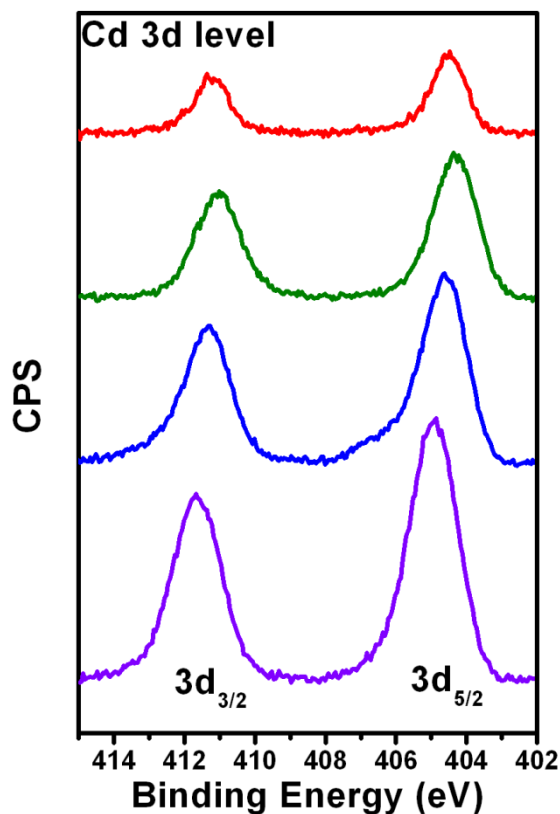

**Figure S3.** XPS data of the Cd 3d level of as-prepared QDs with different heating time (from bottom to top: 30, 60, 90, and 120 min).

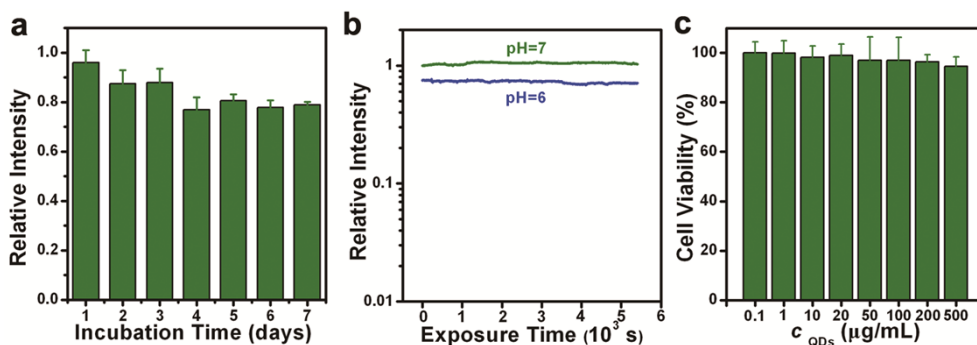

**Figure S4.** Stability measurements, cytotoxicity measurements experiments of QDs-720 (a) Colloidal stabilities of QDs-720 in water at 37 °C for a week. (b) Photo-stabilities of QDs-720 in buffers with different pH values (pH=6.0 and 7.0) for up to 90 min. (c) Cell viability data of MDA-MB-231 cells incubated with QDs-720 after 24 hours in various concentration (0.1, 1, 10, 20, 50, 100, 200, and 500  $\mu\text{g/mL}$ ).

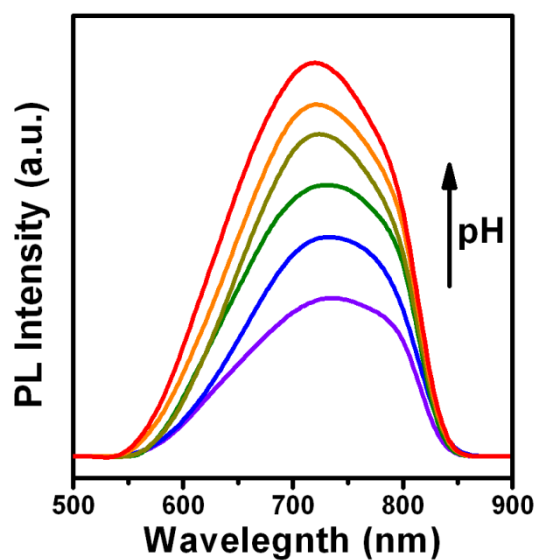

**Figure S5.** Fluorescence emission spectra of QD-720 in buffers with different pH values: 4.0, 5.5, 5.0, 6.0, 6.5, 7.0, and 9.0.

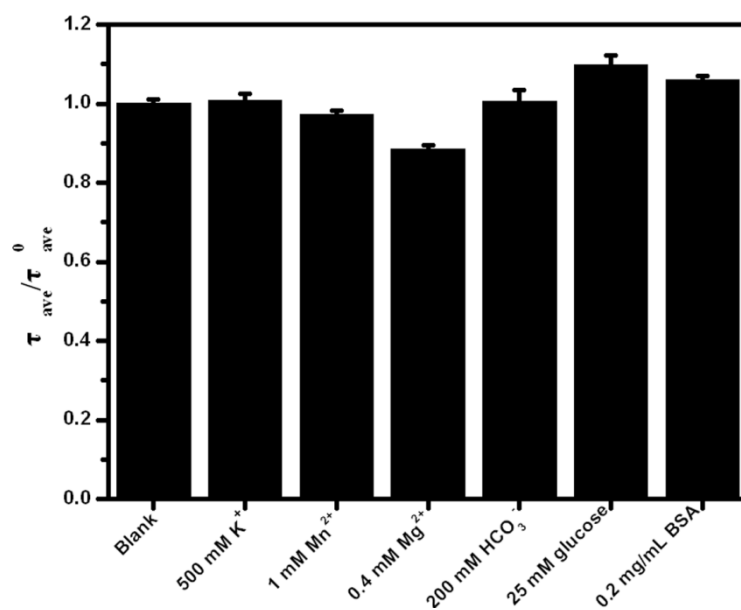

**Figure S6.** Interference study of the QD-720 as pH nanosensors at pH 7.0.



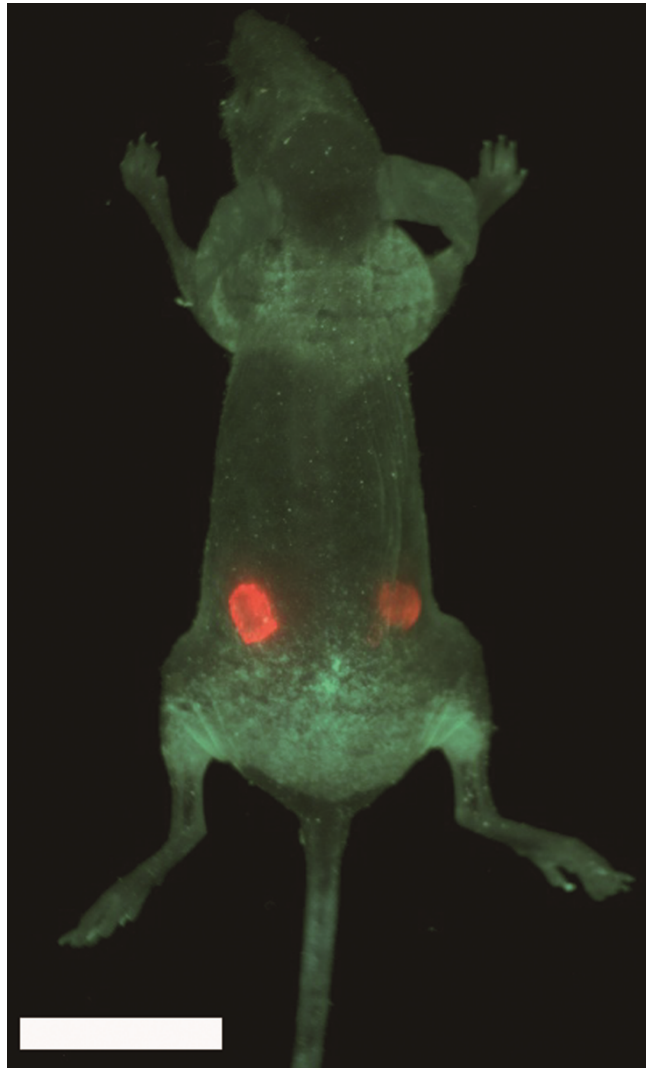

**Figure S7.** *In vivo* imaging experiments of QDs-720 in buffers with different pH values (scale bar: 20 cm)

**Table S1.** Nominal Zn/Cd and Cu/ (Zn+Cd) molar ratios used in the synthesis and the real molar ratios in Cu-doped gradiently alloyed CdZnS QDs with various reaction time determined by ICP-OES.

| Reaction Time (min) | Nominal Zn/Cd molar ratios | Nominal Cu/(Zn+Cd) molar ratios | ICP results of Zn/Cd molar ratios | ICP results of Cu/ (Zn+Cd) molar ratios |
|---------------------|----------------------------|---------------------------------|-----------------------------------|-----------------------------------------|
| 30                  | 4:1                        | 1.00%                           | 1.27:1                            | 1.14%                                   |
| 60                  | 4:1                        | 1.00%                           | 2.36:1                            | 1.07%                                   |
| 90                  | 4:1                        | 1.00%                           | 3.85:1                            | 0.70%                                   |
| 120                 | 4:1                        | 1.00%                           | 7.55:1                            | 0.25%                                   |

**Table S2.** Details fitted parameter and average lifetime values of as-prepared QDs samples with different heating time.

| Heating Time | $a_1$ (%) | $\tau_1$ (ns) | $a_2$ (%) | $\tau_2$ (ns) | $\chi^2$ | $\tau_{\text{average}}$ (ns) |
|--------------|-----------|---------------|-----------|---------------|----------|------------------------------|
| 30           | 21.55     | 182           | 78.45     | 851           | 1.107    | 814                          |
| 60           | 21.61     | 210           | 78.39     | 876           | 1.175    | 835                          |
| 90           | 17.37     | 181           | 82.63     | 883           | 1.167    | 854                          |
| 120          | 22.27     | 211           | 77.73     | 905           | 1.158    | 860                          |

**Table S3.** Details fitted parameter and average lifetime values of as-prepared QDs samples in buffers with different pH.

| pH   | $a_1$ (%) | $\tau_1$ (ns) | $a_2$ (%) | $\tau_2$ (ns) | $\chi^2$ | $\tau_{\text{average}}$ (ns) |
|------|-----------|---------------|-----------|---------------|----------|------------------------------|
| 5.5  | 100       | 262           |           |               | 1.026    | 262                          |
| 5.75 | 100       | 353           |           |               | 1.152    | 353                          |
| 6.0  | 20.02     | 134           | 79.98     | 541           | 1.040    | 517                          |
| 6.25 | 18.02     | 141           | 81.98     | 679           | 1.008    | 655                          |
| 6.5  | 18.53     | 168           | 81.47     | 752           | 1.036    | 723                          |
| 6.75 | 20.45     | 180           | 79.55     | 842           | 1.098    | 807                          |
| 7.0  | 17.37     | 181           | 82.63     | 883           | 1.167    | 854                          |

## Reference

- 1 J. Liu, X. Yang, K. Wang, Q. Wang, H. Ji, C. Wu, J. Li, X. He, J. Tang and J. Huang, *J. Mater. Chem.*, 2012, **22**, 495.
